# Supplementary material for: An antioxidant self-healing hydrogel for 3D cell cultures
Source: Royal Society of Chemistry journal article supplement (doi:10.1039/c9tb02792k), 2020-01-01
Supplement: c9tb02792k1.pdf [file c9tb02792k1.pdf]

## Supporting information

### Antioxidant self-healing hydrogel for 3D cell culture

Lei Yang<sup>#a</sup>, Yuan Zeng<sup>#b</sup>, Haibo Wu<sup>#b</sup>, Chunwu Zhou<sup>\*a</sup>, Lei Tao<sup>\*b</sup>

<sup>a</sup> Department of Diagnostic Radiology, National Cancer Center/National Clinical Research Center for Cancer/Cancer Hospital, Chinese Academy of Medical Sciences and Peking Union Medical College, Beijing 100021, China.

Email: [cjr.zhouchunwu@vip.163.com](mailto:cjr.zhouchunwu@vip.163.com).

<sup>b</sup> The Key Laboratory of Bioorganic Phosphorus Chemistry & Chemical Biology (Ministry of Education), Tsinghua University, Beijing 100084, P. R. China.

Email: [leitao@mail.tsinghua.edu.cn](mailto:leitao@mail.tsinghua.edu.cn).

## Experimental Section

### 1. Materials

All chemicals, reagents, and solvents were purchased from commercial sources and used without further purification. 2-(Acetoacetoxy) ethyl methacrylate (AEMA, Aladdin, 95%), 4-formylphenylboronic acid (FPBA, Heowns, 98%), thiourea (Aladdin, 98%), urea (Aladdin, 98%), magnesium chloride (MgCl<sub>2</sub>, 99%, J&K chemical), ethyl-3-(3-dimethylaminopropyl) carbodiimide hydrochloride (EDC-HCl, 99%, J&K chemical), acetic acid (AcOH, Aladdin, 98%), 4-dimethylaminopyridine (DMAP, 98%, J&K chemical), 2-hydroxyethyl methacrylate (97%, J&K chemical), 4-carboxyphenylboronic acid (Aladdin, 98%), 2,2'-azobis(2,4-dimethyl)valeronitrile (ABVN, 98%, Energy), 2,2'-azinobis(3-ethylbenzothiazoline-6-sulfonate) cationic radical (ABTS<sup>+</sup>•, 97%, J&K chemical), Roswell Park Memorial Institute-1640

(RPMI-1640) culture medium (Corning-Cellgro), phosphate buffered saline (PBS, pH~7.2-7.4, 0.01 M, Solarbio), fetal bovine serum (FBS, Gibco), penicillin-streptomycin solution (Gibco), trypsin-EDTA (Gibco, 0.25%), fluorescein diacetate (FDA, Sigma), propidium iodide (PI, 94%, Sigma) were used as purchased. 2,2'-Azobis(2-methylpropionitrile) (AIBN, J&K, 99.9%) was recrystallized from acetone twice prior to use.

## **2. Instrumental Analysis**

Gel permeation chromatography (GPC) analyses of polymers were performed using N,N-dimethyl formamide (DMF) containing 50 mM LiBr as an eluent. The GPC system was a Shimadzu LC-20AD pump system consisting of an auto injector, a MZ-Gel SDplus 10.0  $\mu\text{m}$  guard column ( $50 \times 8.0$  mm,  $10^2$  Å) followed by a MZ-Gel SDplus 5.0  $\mu\text{m}$  bead-size column ( $50 - 10^6$  Å, linear), a Shimadzu RID-20A refractive index detector. The system was calibrated with narrow molecular weight distribution polystyrene standards ranging from 500 to  $10^6$  g mol<sup>-1</sup>. <sup>1</sup>H NMR and <sup>13</sup>C NMR spectra were obtained using a JEOL JNM-ECA400 (400M Hz) spectrometer for all samples. The ESI-MS data were collected using a Micro TOF-QII Bruker. The FT-IR spectra were made in a transmission mode on a Perkin-Elmer Spectrum 100 spectrometer (Waltham, MA, USA). Rheology analyses were performed on a TA-AR G2 rheometer with parallel plate geometry (20 mm in diameter) at 25°C. SEM photos were taken from HITACHI SU-8010. The absorbance of ABTS<sup>••</sup> (734 nm) was collected using a Thermo Scientific™ Multiskan™ FC Microplate reader. CCK-8 analysis was tested by VICTOR™ X3 PerkinElmer 2030 Multilabel Plate Reader. Confocal microscopy

images are performed on a Zeiss710-3channel confocal microscope.

### 3. Methods

#### 3.1. Synthesis of M1

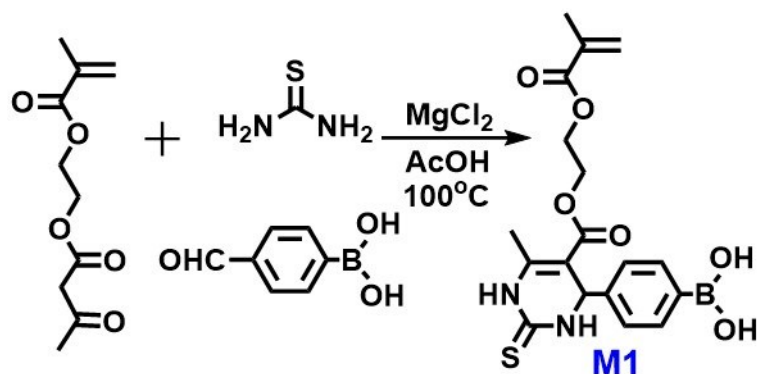

In a 250 mL round-bottom flask, AEMA (32.1 g, 150 mmol), 4-formylphenylboronic acid (22.5 g, 150 mmol), thiourea (17.1 g, 225 mmol) and  $\text{MgCl}_2$  (2.85 g, 30 mmol) were mixed in 75 mL of acetic acid and kept in a  $100^\circ\text{C}$  oil bath for 4 h. The mixture was precipitated in water for 3 times, then precipitated in diethyl ether for 3 times, and dried under vacuum to obtain the pure M1 (54.6 g, yield ~90%) for further polymerization.

$^1\text{H}$  NMR (400 MHz,  $\text{DMSO}-d_6$ )  $\delta$  10.39 (s, 1H), 9.68 (s, 1H), 8.01 (s, 2H), 7.70 (d,  $J = 8.0$  Hz, 2H), 7.15 (d,  $J = 8.0$  Hz, 2H), 5.94 (s, 1H), 5.75 – 5.56 (m, 1H), 5.15 (d,  $J = 3.6$  Hz, 1H), 4.26 – 4.20 (m, 4H), 2.28 (s, 3H), 1.82 (s, 3H).

$^{13}\text{C}$  NMR (101 MHz,  $\text{DMSO}-D_6$ )  $\delta$  174.80, 166.83, 165.44, 146.28, 143.89, 136.06, 129.07, 128.21, 126.79, 126.62, 100.80, 62.98, 62.09, 54.43, 18.45, 17.75.

FT-IR  $\text{cm}^{-1}$ : 3182, 1720, 1701, 1572, 1413, 1355, 1177, 1134, 1096, 772, 653.

ESI-MS ( $m/z$ ):  $[\text{M}+\text{H}^+]$  405.1118 (theoretical value: 405.1115).

M2 was prepared by using urea instead of thiourea through the same procedure.

$^1\text{H}$  NMR (400 MHz,  $\text{DMSO}-d_6$ )  $\delta$  9.25 (d,  $J = 1.6$  Hz, 1H), 7.98 (s, 2H), 7.75 (dd,  $J = 3.2, 2.1$  Hz, 1H), 7.69 (d,  $J = 8.1$  Hz, 2H), 7.17 (d,  $J = 8.1$  Hz, 2H), 5.95 (m, 1H), 5.65 (m, 1H), 5.12 (d,  $J = 3.3$  Hz, 1H), 4.22 (dd,  $J = 8.2, 4.4$  Hz, 4H), 2.24 (s, 2H), 1.83 (s, 3H).

$^{13}\text{C}$  NMR (101 MHz,  $\text{DMSO}-D_6$ )  $\delta$  166.31, 165.09, 152.12, 149.09, 146.39, 135.53, 134.22, 126.02, 125.12, 98.79, 62.51, 61.21, 53.83, 17.91, 17.84.

FT-IR  $\text{cm}^{-1}$ : 3256, 3382, 1683, 1632, 1448, 1374, 1343, 1219, 1090, 758, 659.

ESI-MS ( $m/z$ ):  $[\text{M}+\text{H}^+]$  389.1421 (theoretical value: 389.1426).

### 3.2. Preparation of P1

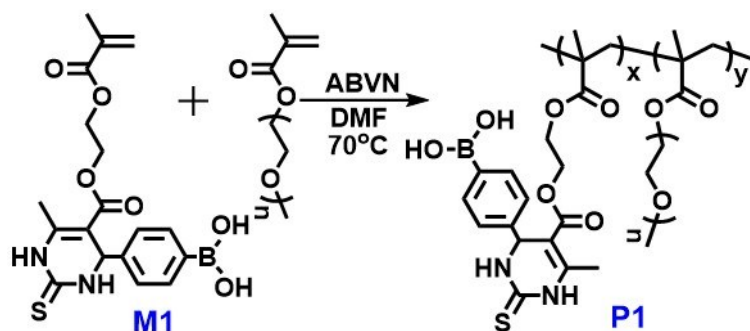

In a 250 mL round-bottom flask, M1 (20.2 g, 50 mmol), PEGMA (47.5 g, 50 mmol) and ABVN (0.25 g, 1mmol) were mixed in 50 mL DMF. The flask was sealed with a rubber septum and purged by nitrogen flow for 30 min, and kept in a 70°C oil bath for 12 h, sample was taken for the  $^1\text{H}$  NMR and the conversion of polymerization was calculated as ~95%. The mixture was precipitated in diethyl ether for 3 times, and dried under vacuum to obtain the pure polymer (63.4 g, yield ~94%).

P2 was similarly prepared using M2.

### 3.3. Synthesis of a PBA-ester Monomer (M3)

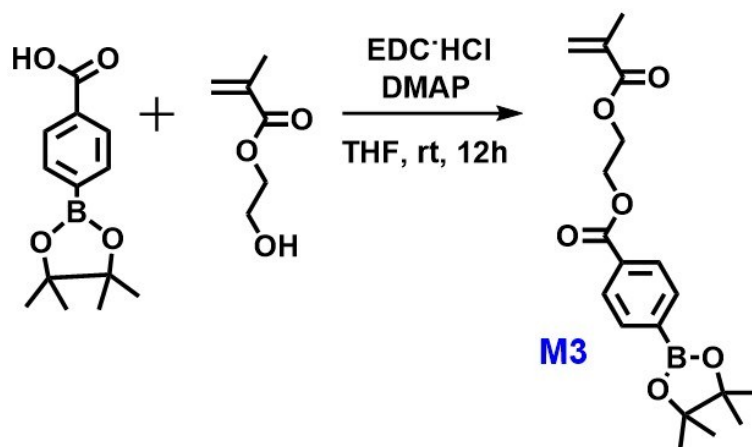

In a 50 mL round-bottom flask, 2-hydroxyethyl methacrylate (1.3 g, 10 mmol), 4-carboxyphenylboronic acid pinacol ester (2.48 g, 10 mmol), EDC HCl (3.8 g, 20 mmol) and DMAP (0.05 g, 0.4 mmol) were mixed in 40 mL of THF and kept at 25°C for 12 h. Then, the mixture was added H<sub>2</sub>O (30 mL), and extracted with ethyl acetate (50 mL) for three times. The organic layer was separated and dried by MgSO<sub>4</sub>. After removing the solvent by vacuum, the product was purified by a flash chromatography (ethyl acetate/petroleum ether: 1/4) as a pale yellow solid (3.0 g, 83%).

<sup>1</sup>H NMR (400 MHz, DMSO-*d*<sub>6</sub>) δ 7.95 (d, *J* = 8.2 Hz, 2H), 7.81 (d, *J* = 8.2 Hz, 2H), 6.07 – 5.97 (t, *J* = 1.6 Hz, 1H), 5.68 (t, *J* = 1.6 Hz, 1H), 4.62 – 4.50 (m, 2H), 4.49 – 4.41 (m, 2H), 1.85 (s, 3H), 1.31 (s, 12H).

<sup>13</sup>C NMR (101 MHz, DMSO-*D*<sub>6</sub>) δ 166.39, 165.48, 135.61, 134.64, 131.79, 128.43, 126.11, 84.12, 62.78, 62.32, 24.66, 17.92.

FT-IR cm<sup>-1</sup>: 2987, 1719, 1399, 1354, 1318, 1274, 1173, 1110, 852, 810, 709, 643.

ESI-MS (*m/z*): [M+H<sup>+</sup>] 361.1721 (theoretical value: 361.1717).

### 3.4. Preparation of the P3

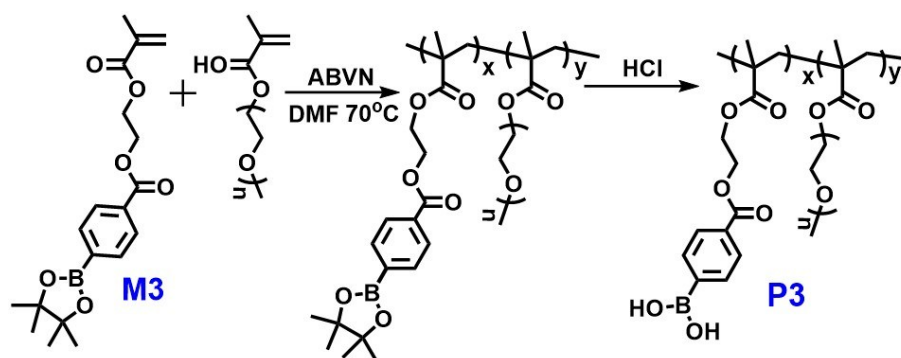

In a 25 mL Schleck tube, monomer M3 (1.8 g, 5 mmol), PEGMA (4.75 g, 5 mmol) and ABVN (0.025 g, 1mmol) were mixed in 5 mL DMF. The tube was sealed with a rubber septum and purged by nitrogen flow for 30 min, and kept in a 70°C oil bath for 12 h, sample was taken for the  $^1\text{H}$  NMR and the conversion of polymerization was calculated as 98%. The mixture was precipitated in diethyl ether for 3 times, and dried under vacuum to obtain a P3-precursor copolymer (5.7 g, yield ~87%). Then, the P3-precursor polymer (3.0 g) was dissolved in 2M HCl (20 mL). The mixture was kept at 25°C for 2h, then dialyzed against  $\text{H}_2\text{O}$  and MeOH (MWCO: 3500) to get P3 quantitatively.

### 3.5. Antioxidative test of P1, P2 and P3

ABTS $^{+\bullet}$  solution was prepared by mixing aqueous solutions of 2,2'-azino-bis(3-ethylbenzothiazoline-6-sulfonic acid) diammonium salt (ABTS, 3.84 mg/mL, 10 mL) and potassium persulfate (0.66 mg/mL, 10 mL), and kept overnight.

ABTS $^{+\bullet}$  solution was diluted by PBS solution to the absorbance of  $\sim 0.70$ , then added into a 96-well plate ( $\sim 100\ \mu\text{L}$ ) followed by adding a P1 PBS solution (20  $\mu\text{L}$ , 8 wt%). The absorbance was measured by a microplate reader at 734 nm. P2 and P3 were tested similarly. PBS solution was used as a blank solution. The results were presented as mean  $\pm$  standard deviation (SD),  $n = 3$ .

### **3.6. Hydrogel preparation**

The solution of PVA in PBS (7 wt%, pH  $\sim$  7.4) was prepared by dissolving PVA powders (2.8 g) in PBS solution (37.2 g, pH  $\sim$  7.4). A series of P1 solutions in PBS solution (6 wt%, 7 wt%, and 8 wt%) were prepared by dissolving P1 (0.18 g, 0.21 g, 0.24 g) in PBS solution (2.82 g, 2.79 g, and 2.76 g, pH  $\sim$  7.4) respectively. As a typical example, Gel-6/7 was prepared by mixing equal volume solutions of P1 (6 wt%) and PVA (7 wt%), and a hydrogel was quickly formed in  $\sim$  100 s. Gel-7/7 and Gel-8/7 were prepared similarly.

Other hydrogels (prepared by P2, P3) were prepared similarly.

### **3.7. Rheology analysis**

Typically, a piece of hydrogel ( $\sim$  0.6 mL,  $\sim$  2.0 cm diameters) was put on the measuring plate of a rheometer. The storage modulus ( $G'$ ) and loss modulus ( $G''$ ) of the hydrogel were recorded under frequency sweep step (strain = 1%).

All hydrogels were tested through the same process.

### **3.8. Self-healing test of the hydrogel**

Typically, Gel-8/7 was prepared in a syringe, then injected into a glass bottle. Photos were taken to monitor the morphology changes of Gel-8/7 after injection.

Rheology analyses were further carried out to test the shear-thinning property of the hydrogels. Typically, Gel8/7 was prepared as described. The moduli of Gel8/7 under different strains were tested (frequency = 1 Hz). Then, alternative changed strains (1%, 400%) under the same frequency (1.0 Hz) were applied to Gel8/7.  $G'$  and  $G''$  values were recorded. The shear-thinning properties of Gel-8/8 and Gel-8/10 were

tested similarly.

### **3.9. Antioxidant ability of the P1-PVA hydrogels**

A PBS solution of PVA (10 wt%, 400  $\mu$ L, PH  $\sim$  7.4) was added an ABTS<sup>++</sup> solution (absorbance  $\sim$ 3, 172  $\mu$ L) to prepared PVA-ABTS<sup>++</sup> solution (7 wt%, absorbance  $\sim$ 3, pH  $\sim$  7.4). Then P1 solution in PBS (572  $\mu$ L, 8 wt%, pH $\sim$ 7.4) was added to get a P1-PVA-ABTS<sup>++</sup> hydrogel. Photos was taken at different time to monitor the colour change of ABTS<sup>++</sup> in hydrogel.

The absorbance of the P1-PVA- ABTS<sup>++</sup> hydrogel was measured in a microplate reader (734 nm). The results were presented as mean  $\pm$  standard deviation (SD), n = 3.

P2-PVA hydrogels were prepared and tested similarly.

### **3.10. Cell culture**

L929 cells were cultured in RPMI1640 medium (supplemented with 10% FBS, 1% penicillin and streptomycin) and incubated at 37°C, 5% CO<sub>2</sub>. The medium was changed every two days to maintain the exponential growth of the cells. The cells were harvested with 0.025 (w/v)% trypsin and 0.01% EDTA, centrifuged and resuspended in the RPMI-1640 medium.

### **3.11. Cytotoxicity evaluation**

The cytotoxicity to L929 cells was evaluated by a cell count kit-8 (CCK-8) assay.

L929 cells were seeded in 96-well microplates at a density of  $1 \times 10^5$  cells/mL in 100  $\mu$ L of respective well. After cell attachment for 24 h, the cells were incubated in 100  $\mu$ L medium containing 1, 2, 4, 8, 16 mg/mL of P1 for 24 h. Then P1 was removed

and cells were washed with PBS for three times. Then the cells were incubated in 100  $\mu$ L of culture medium containing 10% CCK-8 solution at 37°C for 2 h. Plates were then analysed with a microplate reader (VICTOR™ X3 PerkinElmer 2030 Multilabel Plate Reader). Absorbance was measured at 450 nm. The values were proportional to the number of live cells. The results were presented as mean  $\pm$  standard deviation (SD), n = 5.

P2, P3 and PVA were also assayed using the same method.

### **3.12. 3D cell culture**

L929 cells ( $1 \times 10^6$  cells/mL) were resuspended in a culture medium containing P1 (8 wt%). The L929/P1 medium (500  $\mu$ L) was pipetted into a petri-dish, then PVA in medium (7 wt%, 500  $\mu$ L) was pipetted into the same dish. The dish was gently shaken to form Gel8/7-L929 evenly. The gels were incubated at 37°C, 5% CO<sub>2</sub>, and imaged either after 24 h or 48 h. To observe the survival of the cells inside, PBS-FDA-PI solution (FDA: 5  $\mu$ g/mL; PI: 5  $\mu$ g/mL, 1 mL) was added to the surface of Gel8/7-L929. After stored in the dark for 10 minutes, the cells were monitor by a confocal microscopy. The live and dead cells were observed through 450-490 nm and 515-560 nm band-pass excitation filters, respectively. The z-stacks were taken through the depth of the gels to detect the distribution of cells throughout. Viability is reflected by the percentage of FDA stained cells to total cells.

Gel8/7-L929 prepared as above was put in a syringe. Then, this cell-containing hydrogel was injected into a petri-dish through a 21G needle. The injected Gel8/7-L929 was incubated and monitored using the same method.

## Supporting data

**Table S1.** Polymer parameters.

| Name | $M_n$ (GPC) <sup>a</sup> | PDI <sup>a</sup> |
|------|--------------------------|------------------|
| P1   | 126700                   | 4.24             |
| P2   | 72600                    | 2.67             |
| P3   | 55900                    | 2.61             |

<sup>a</sup> Measured by gel permeation chromatography (GPC) using N, N-dimethylformamide (DMF) as eluent (1 mL/min).

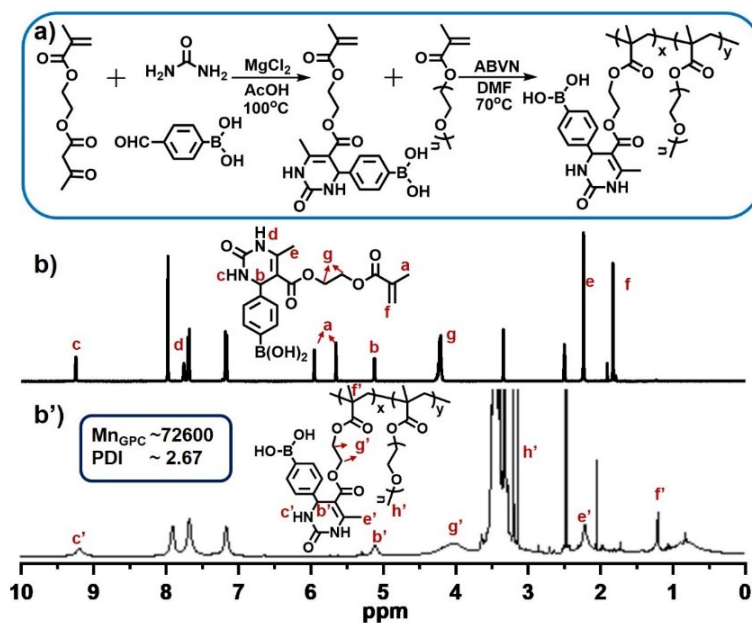

**Figure S1.** a) Preparation of M2 and P2.; b, c)  $^1H$  NMR spectra (DMSO- $d_6$ , 400 MHz) of M2 and P2 (b: M2; c: P2).

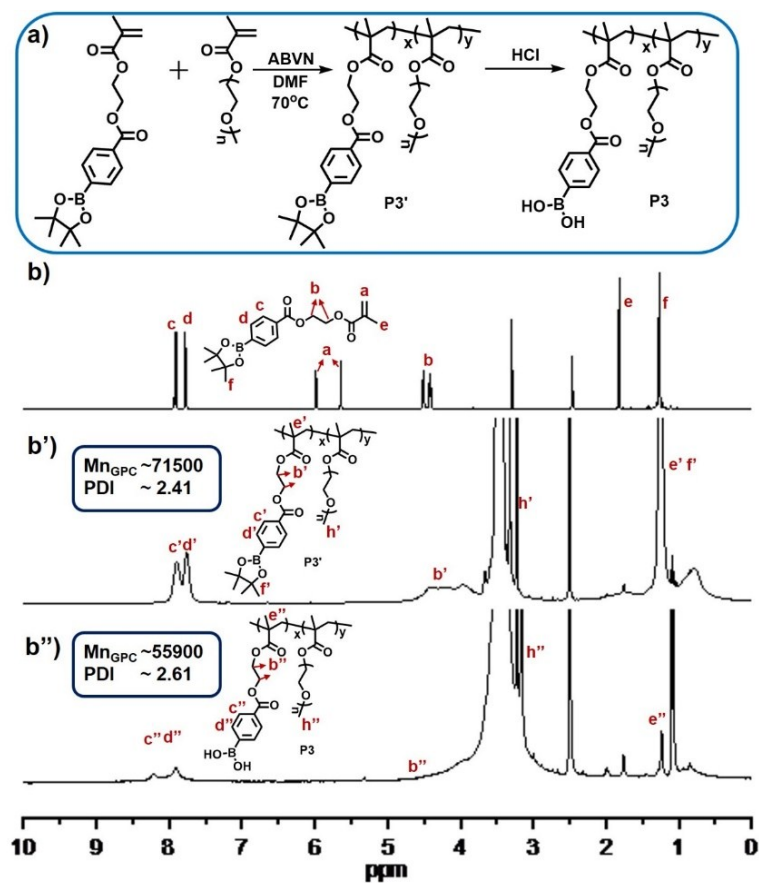

**Figure S2.** a) Preparation of M3 and P3; b, b', b'')  $^1\text{H}$  NMR spectra (DMSO- $d_6$ , 400 MHz) of M3, P3-precursor and P3 (b: M3; b': P3-precursor; b'': P3).

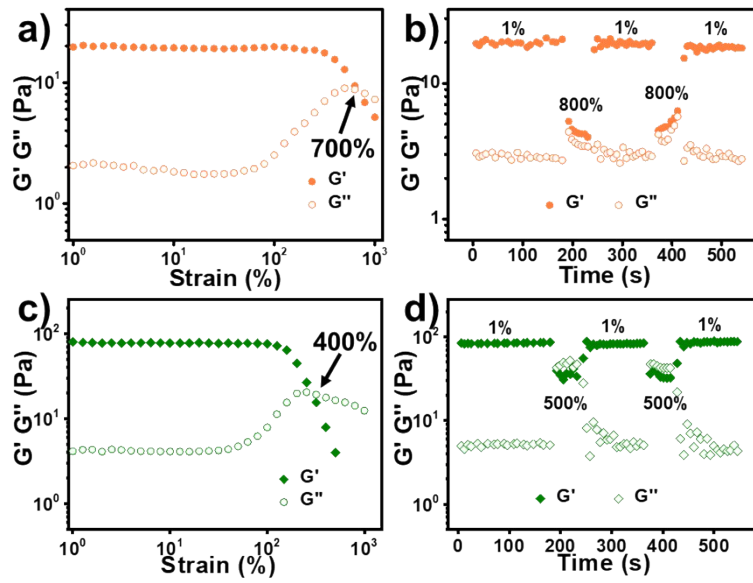

**Figure S3.** a) The storage modulus  $G'$  and loss modulus  $G''$  of Gel-8/6 vs. different strains; b)  $G'$  and  $G''$  of Gel-8/6 at alternating strains (1% and 800%); c) The storage modulus  $G'$  and loss modulus  $G''$  of Gel-8/7 vs. different strains; d)  $G'$  and  $G''$  of Gel-8/7 at alternating strains (1% and 500%).

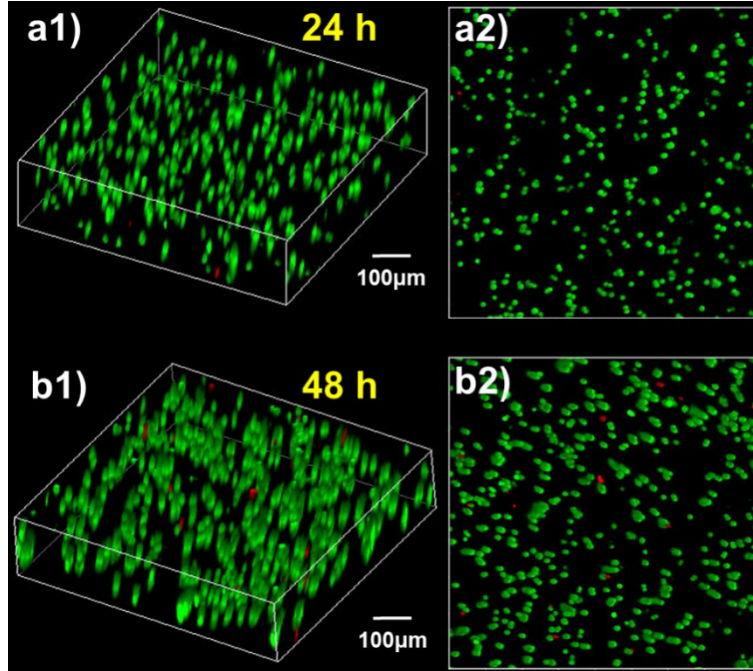

**Figure S4.** a, b) Fluorescein diacetate/propidium iodide (FDA/PI) double staining of cells in Gel-8/7 after injection (a: 24 h, b: 48 h); a2, b2: cell observations from the top of Gel-8/7.
